# Supplementary material for: Identification of a Bacteria-Like Ferrochelatase in Strongyloides venezuelensis, an Animal Parasitic Nematode
Source: PubMed Central journal article supplement (PMC3596385; doi:10.1371/journal.pone.0058458), 2013-03-13
Supplement: pone.0058458.s001.pdf [file pone.0058458.s001.pdf]

**Table S1** List of primers used in this study

| Number | Name     | 5' -> 3' sequence                             | direction | Restriction sequence |
|--------|----------|-----------------------------------------------|-----------|----------------------|
| 1      | ENM059   | TGTTGGTGGAGCATGTGATG                          | forward   | -                    |
| 2      | ENM008   | GACCACGCGTATCGATGTCGAC                        | -         | -                    |
| 3      | ENM060   | CCCACTCCCATATAACCGTGA                         | forward   | -                    |
| 4      | ENM070   | TCCTCAATATTGTGTGGTCCAT                        | reverse   | -                    |
| 5      | ENM072   | TGGTGATTCATCCTTCTCCAT                         | reverse   | -                    |
| 6      | ENM073   | ATGTCGTCTAACAATAATGTTAAAATTC                  | forward   | -                    |
| 7      | ENM5_6_7 | GACCACGCGTATCGATGTCGACTTTTTTTTTTTTTTV         | -         | -                    |
| 8      | ENM008   | GACCACGCGTATCGATGTCGAC                        | -         | -                    |
| 9      | ENM074   | TTATTTTGTATTTATATTAATTAACTTTTCAAG             | reverse   | -                    |
| 10     | TKT001   | AAAGAATTCGAATATTAATAGTATCAA                   | forward   | EcoRI                |
| 11     | TKT002   | AAAAAGCTTCTAAAAGTTATTACTAT                    | reverse   | HindIII              |
| 12     | ENM089   | ATCGCTCGAGATGTCGTCTAACAATAATGTTAAAATTCAATC    | forward   | XhoI                 |
| 13     | ENM098   | GCTAAGATCTCTAAAAGTTATTACTATCAATTAATTGACATAGAA | reverse   | BglII                |
| 14     | ENM056   | CCTCAATATTGTGTGGTCCATATC                      | reverse   | -                    |
| 15     | ENM057   | TGGAGAAGGATGAATCACCATTATTA                    | forward   | -                    |
| 16     | 377F     | AAGGAAAGGGCAAGTCTGGT                          | forward   | -                    |
| 17     | 501R     | CATCCAAGATGCTCATTACACA                        | reverse   | -                    |
