# Supplementary material for: Identification of a Bacteria-Like Ferrochelatase in Strongyloides venezuelensis, an Animal Parasitic Nematode
Source: PubMed Central journal article supplement (PMC3596385; doi:10.1371/journal.pone.0058458), 2013-03-13
Supplement: pone.0058458.s002.pdf [file pone.0058458.s002.pdf]

**Table S2** Taxonomic affiliation and accession numbers for the sequences considered in the phylogene

| Higher Taxon         | Accession               | Organism names                            |                                   |
|----------------------|-------------------------|-------------------------------------------|-----------------------------------|
| Alpha-proteobacteria | YP004285020             | Acidiphilium multivorum AIU301            |                                   |
|                      | NP422556                | Caulobacter crescentus CB15               |                                   |
|                      | YP001937208             | Orientia tsutsugamushi str Ikeda          |                                   |
|                      | YP003854109             | Parvularcula bermudensis HTCC2503         |                                   |
|                      | YP004550179             | Sinorhizobium meliloti AK83               |                                   |
|                      | YP003576367             | Rhodobacter capsulatus SB 1003            |                                   |
|                      | YP162038                | Zymomonas mobilis subsp. mobilis ZM4      |                                   |
|                      | YP865616                | Magnetococcus sp. MC-1                    |                                   |
|                      | YP865616                | Wolbachia sp. wRi                         |                                   |
|                      | YP198549                | Wolbachia Wbm                             |                                   |
| Beta-proteobacteria  | YP003082820             | Neisseria meningitidis alpha14            |                                   |
|                      | YP002355372             | Thauera sp. MZ1T                          |                                   |
|                      | YP003523671             | Sideroxydans lithotrophicus ES-1          |                                   |
|                      | YP315791                | Thiobacillus denitrificans ATCC 25259     |                                   |
|                      | YP003051656             | Methylovorus glucosetrophus SIP3-4        |                                   |
|                      | YP004294842             | Nitrosomonas sp. AL212                    |                                   |
|                      | YP003751536             | Ralstonia solanacearum PSI07              |                                   |
|                      | Gamma-proteobacteria    | YP003526615                               | Nitrosococcus halophilus Nc4      |
|                      |                         | YP004135566                               | Haemophilus influenzae F3031      |
|                      |                         | YP004827520                               | Enterobacter asburiae LF7a        |
| YP004392921          |                         | Aeromonas veronii B565                    |                                   |
| YP129238             |                         | Photobacterium profundum SS9              |                                   |
| YP004313230          |                         | Marinomonas mediterranea MMB-1            |                                   |
| YP004785265          |                         | Acidithiobacillus ferrivorans SS3         |                                   |
| YP001266120          |                         | Pseudomonas putida F1                     |                                   |
| YP003617676          |                         | Legionella pneumophila 2300/99 Alcov      |                                   |
| YP001210125          |                         | Dichelobacter nodosus VCS1703A            |                                   |
| Delta-proteobacteria | YP004537681             | Thioalkalimicrobium cyclicum ALM1         |                                   |
|                      | NP718902                | Shewanella oneidensis MR-1                |                                   |
|                      | YP114114                | Methylococcus capsulatus str. Bath        |                                   |
|                      | YP004853627             | Xanthomonas axonopodis pv citrumelo F1    |                                   |
|                      | YP005885474             | Marinobacter adhaerens HP15               |                                   |
|                      | YP003951943             | Stigmatella aurantiaca DW4/3-1            |                                   |
|                      | Chlamydiae/Verrucomicro | YP001819352                               | Opitutus terrae PB90-1            |
|                      |                         | NP219999                                  | Chlamydia trachomatis D/UW-3/CX   |
|                      | Bacteroidetes           | YP 680066                                 | Cytophaga hutchinsonii ATCC 33406 |
|                      |                         | YP 004316311                              | Sphingobacterium sp. 21           |
| YP 004579396         |                         | Lacinutrix sp. 5H-3-7-4                   |                                   |
| Actinobacteria       | YP 003145049            | Slackia heliotrinireducens DSM 20476      |                                   |
|                      | YP 004723195            | Mycobacterium africanum GM041182          |                                   |
|                      | YP 003110115            | Acidimicrobium ferrooxidans DSM 10331     |                                   |
| Chloroflexi          | YP 002522588            | Thermomicrobium roseum DSM 5159           |                                   |
|                      | YP 003320569            | Sphaerobacter thermophilus DSM 20745      |                                   |
|                      | YP 001432135            | Roseiflexus castenholzii DSM 13941        |                                   |
|                      | YP 001546311            | Herpetosiphon aurantiacus DSM 785         |                                   |
| Firmicutes           | YP 073989               | Symbiobacterium thermophilum IAM 14863    |                                   |
|                      | YP 004326063            | Streptococcus oralis Uo5                  |                                   |
|                      | YP 003972425            | Bacillus atrophaeus 1942                  |                                   |
| Deinococcus-Thermus  | YP 002785119            | Deinococcus deserti VCD115                |                                   |
|                      | YP 003507187            | Meiothermus ruber DSM 1279                |                                   |
| Cyanobacteria        | YP 001658460            | Microcystis aeruginosa NIES-843           |                                   |
|                      | YP 323262               | Anabaena variabilis ATCC 29413            |                                   |
|                      | YP 003137494            | Cyanothece sp. PCC 8802                   |                                   |
|                      | NP 442453               | Synechocystis sp. PCC 6803                |                                   |
|                      | NP 923785               | Gloeobacter violaceus PCC 7421            |                                   |
|                      | YP 723781               | Trichodesmium erythraeum IMS101           |                                   |
|                      | YP 172078               | Synechococcus elongatus PCC 6301          |                                   |
|                      | YP 001550413            | Prochlorococcus marinus str MIT 9211      |                                   |
|                      | YP 001516290            | Acarochloris marina MBIC11017             |                                   |
|                      | NP 683006               | Thermosynechococcus elongatus BP-1        |                                   |
| Acidobacteria        | YP 731203               | Synechococcus sp. CC9311                  |                                   |
|                      | YP 002755471            | Acidobacterium capsulatum ATCC 51196      |                                   |
| Spirochetes          | YP 822312               | Candidatus Solibacter usitatus Ellin6076  |                                   |
|                      | YP 003786643            | Brachyspira pilosicoli 95/1000            |                                   |
| Chrysiogenetes       | YP 004112072            | Desulfurispirillum indicum S5             |                                   |
| Gemmatimonadetes     | YP 002762295            | Gemmatimonas aurantiaca T-27              |                                   |
| Deferribacteres      | YP 003495576            | Deferribacter desulfuricans SSM1          |                                   |
| Aquificales          | YP 004281002            | Desulfurobacterium thermolithotrophum DSM |                                   |
| Chlorobi             | YP 002018719            | Pelodictyon phaeoclathratiforme BU-1      |                                   |
| Nitrospirae          | YP 003796898            | Candidatus Nitrospira defluvii            |                                   |
| Planctomycetes       | YP 003370976            | Pirellula staleyi DSM 6068                |                                   |

Table S2 (continued)

| Higher Taxon     | Accession    | Organism names                                                |
|------------------|--------------|---------------------------------------------------------------|
| Metazoa          | EAT43108     | <i>Aedes aegypti</i>                                          |
|                  | AAC26225     | <i>Drosophila melanogaster</i>                                |
|                  | AF2503681    | <i>Danio rerio</i>                                            |
|                  | AAB94626     | <i>Xenopus laevis</i>                                         |
|                  | CAB65962     | <i>Homo sapiens</i>                                           |
|                  | AAZ78230     | <i>Pan troglodytes</i>                                        |
|                  | AAA79169     | <i>Bos taurus</i>                                             |
|                  | BAI47962     | <i>Sus scrofa domestica</i>                                   |
|                  | AAA37615     | <i>Mus musculus</i>                                           |
|                  | AAB66503     | <i>Gallus gallus</i>                                          |
|                  | CCD75202     | <i>Schistosoma mansoni</i>                                    |
|                  | EDO40867     | <i>Nematostella vectensis</i>                                 |
| Fungi            | NP587720     | <i>Schizosaccharomyces pombe</i> 972h-                        |
|                  | XP003194818  | <i>Cryptococcus gattii</i> WM276                              |
|                  | EFP82759     | <i>Puccinia graminis</i> f.sp. <i>tritici</i> CRL 75-36-700-3 |
|                  | AAA34667     | <i>Saccharomyces cerevisiae</i>                               |
|                  | CCA39904     | <i>Komagataella pastoris</i> CBS 7435                         |
|                  | EGV64906     | <i>Candida tenuis</i> ATCC 10573                              |
|                  | XP001396807  | <i>Aspergillus niger</i> CBS 513.88                           |
|                  | EFW23046     | <i>Coccidioides posadasii</i> str. Silveira                   |
|                  | XP002544726  | <i>Uncinocarpus reesii</i> 1704                               |
|                  | EEH10395     | <i>Ajellomyces capsulatus</i> G186AR                          |
|                  | EEH17729     | <i>Paracoccidioides brasiliensis</i> Pb03                     |
|                  | EEQ29549     | <i>Arthroderma otae</i> CBS 113480                            |
|                  | EGE07189     | <i>Trichophyton equinum</i> CBS 127.97                        |
|                  | EGY20619     | <i>Verticillium dahliae</i> VdLs.17                           |
|                  | EFQ30694     | <i>Glomerella graminicola</i> M1.001                          |
|                  | EHA54679     | <i>Magnaporthe oryzae</i> 70-15                               |
|                  | EFX05816     | <i>Grosmannia clavigera</i> kw1407                            |
|                  | EAU91411     | <i>Coprinopsis cinerea</i> okayama7#130                       |
| Amoebozoa        | EGG22223     | <i>Dictyostelium fasciculatum</i>                             |
|                  | EFA74915     | <i>Polysphondylium pallidum</i> PN500                         |
| Ciliates         | XP001347260  | <i>Paramecium tetraurelia</i> strain d4-2                     |
|                  | XP001017797  | <i>Tetrahymena thermophila</i>                                |
| Kinetoplastida   | AEM25314     | <i>Phytomonas</i> sp. JMPA-2011                               |
|                  | AEM25309     | <i>Angomonas deanei</i>                                       |
|                  | AEM25307     | <i>Strigomonas culicis</i>                                    |
|                  | AEM25313     | <i>Herpetomonas muscarum</i>                                  |
|                  | AEM25312     | <i>Leptomonas costaricensis</i>                               |
|                  | AEM25316     | <i>Parabodo caudatus</i>                                      |
| Euglenida        | AEA86537     | <i>Euglena gracilis</i>                                       |
|                  | AEA86538     | <i>Euglena gracilis</i>                                       |
| Chromerida       | AEQ18828     | <i>Chromera velia</i>                                         |
|                  | AEQ18827     | <i>Chromera velia</i>                                         |
| Stramenopiles    | XP 002286994 | <i>Thalassiosira pseudonana</i> CCMP1335                      |
|                  | XP 002179541 | <i>Phaeodactylum tricornutum</i> CCAP 1055                    |
|                  | CCA26575     | <i>Albugo laibachii</i> Nc14                                  |
|                  | XP 002899013 | <i>Phytophthora infestans</i> T30-4                           |
|                  | EGZ14268     | <i>Phytophthora sojae</i>                                     |
| Choanoflagellida | EGD74306     | <i>Salpingoeca</i> sp. ATCC 50818                             |
| Heterolobosea    | XP 002681413 | <i>Naegleria gruberi</i>                                      |
| Apicomplexa      | CAD12105     | <i>Plasmodium yoelii</i>                                      |
| Chlorophyta      | EDP03868     | <i>Chlamydomonas reinhardtii</i>                              |
|                  | AF3329631    | <i>Polytomella</i> sp. Pringsheim 198.80                      |
| Streptophyta     | EFJ10716     | <i>Selaginella moellendorffii</i>                             |
|                  | BAB20760     | <i>Cucumis sativus</i>                                        |
|                  | BAA22284     | <i>Oryza sativa</i>                                           |
|                  | CAA73614     | <i>Arabidopsis thaliana</i>                                   |
|                  | CAC50871     | <i>Nicotiana tabacum</i>                                      |
|                  | CAA06705     | <i>Solanum tuberosum</i>                                      |
|                  | AAB71887     | <i>Hordeum vulgare</i>                                        |
|                  | BAA05102     | <i>Cucumis sativus</i>                                        |
| Ichthyosporea    | EFW39873     | <i>Capsaspora owczarzaki</i> ATCC 30864                       |
| Rhizaria         | ACB43300     | <i>Paulinella chromatophora</i>                               |
| Nematodes        | ADI33752     | <i>Dirofilaria immitis</i>                                    |
|                  | ADI33751     | <i>Onchocerca volvulus</i>                                    |
|                  | ADI33750     | <i>Acanthocheilonema viteae</i>                               |
|                  | ADI33748     | <i>Brugia malayi</i>                                          |
|                  | ADI33749     | <i>Brugia malayi</i>                                          |
|                  | AB710465*    | <i>Strongyloides venezuelensis</i>                            |
|                  | LSC01092 1** | <i>Litomosoides sigmodontis</i>                               |

Accession numbers are for NCBI GenBank, unless specified

\*Identified in this study

\*\* Obtained from NEMBASE4 (<http://www.nematodes.org/nembase4/>)
