# Supplementary material for: Identification of a Bacteria-Like Ferrochelatase in Strongyloides venezuelensis, an Animal Parasitic Nematode
Source: PubMed Central journal article supplement (PMC3596385; doi:10.1371/journal.pone.0058458), 2013-03-13
Supplement: pone.0058458.s003.pdf [file pone.0058458.s003.pdf]

**Table S3** BLAST homology search against predicted proteins from published nematode genome projects

| nematode clade | Species                | Mode of life | ALAD                | PBGD                | UROS                | UROD                 | CPOX                 | PPOX                | FECH                 |
|----------------|------------------------|--------------|---------------------|---------------------|---------------------|----------------------|----------------------|---------------------|----------------------|
| V              | <i>C. briggsae</i>     | FL           | -                   | -                   | -                   | -                    | -                    | -                   | -                    |
| V              | <i>C. elegans</i>      | FL           | -                   | -                   | -                   | -                    | -                    | -                   | -                    |
| V              | <i>P. pacificus</i>    | FL           | $2 \times 10^{-16}$ | -                   | -                   | -                    | -                    | -                   | -                    |
| IV             | <i>M. incognita</i>    | PP           | -                   | -                   | -                   | -                    | -                    | -                   | -                    |
| IV             | <i>M. hapla</i>        | PP           | -                   | -                   | -                   | -                    | -                    | -                   | -                    |
| IV             | <i>B. xylophilus</i>   | PP           | -                   | -                   | -                   | -                    | -                    | -                   | -                    |
| III            | <i>B. malayi</i>       | AP           | -                   | -                   | -                   | -                    | -                    | -                   | $6 \times 10^{-21}$  |
| III            | <i>A. suum</i>         | AP           | -                   | -                   | -                   | -                    | -                    | -                   | -                    |
| I              | <i>T. spiralis</i>     | AP           | -                   | -                   | -                   | -                    | -                    | -                   | -                    |
|                | <i>D. melanogaster</i> | FL           | $3 \times 10^{-19}$ | $8 \times 10^{-78}$ | $1 \times 10^{-25}$ | $1 \times 10^{-105}$ | $1 \times 10^{-123}$ | $9 \times 10^{-79}$ | $1 \times 10^{-111}$ |

Human sequences of heme biosynthetic genes used as queries are as follows: ALAD (aminolevulinic acid dehydratase, AY319481.1) PBGD (porphobilinogen deaminase, NM\_000190.3), UROS (uroporphyrinogen III synthase, BC002573.2), UROD (uroporphyrinogen decarboxylase, CR456976.1), CPOX (coproporphyrinogen oxidase, NM\_000097.5), PPOX (protoporphyrinogen oxidase, NM\_000309.3), FECH (ferrochelatase, BC039841.1). A cut-off E-value of  $1 \times 10^{-4}$  was used in this BLASTx analysis. Minus mark indicates no hits were found. In case hits were found, E-values for respective hits are shown. FL: free-living, PP: plant-parasitic, AP: animal-parasitic.
