# Supplementary material for: Identification of a Bacteria-Like Ferrochelatase in Strongyloides venezuelensis, an Animal Parasitic Nematode
Source: PubMed Central journal article supplement (PMC3596385; doi:10.1371/journal.pone.0058458), 2013-03-13
Supplement: pone.0058458.s004.pdf [file pone.0058458.s004.pdf]

**Table S4** Blast homology search against nematode EST database (NEMBASE 4)

| Gene | NEMBASE4 ID | species                              | clade | mode of life | E-value               |
|------|-------------|--------------------------------------|-------|--------------|-----------------------|
| ALAD | ACC10593_1  | <i>Ancylostoma caninum</i>           | V     | AP           | 4 x 10 <sup>-26</sup> |
| ALAD | HBC00099_1  | <i>Heterorhabditis bacteriophora</i> | V     | EP           | 2 x 10 <sup>-5</sup>  |
| ALAD | MHC08010_1  | <i>Meloidogyne hapla</i>             | IV    | PP           | 6 x 10 <sup>-39</sup> |
| ALAD | NAC01466_1  | <i>Necator americanus</i>            | V     | AP           | 9 x 10 <sup>-22</sup> |
| ALAD | OVC00266_1  | <i>Onchocerca volvulus</i>           | III   | AP           | 6 x 10 <sup>-5</sup>  |
| ALAD | WBC01431_1  | <i>Wuchereria bancrofti</i>          | III   | AP           | 2 x 10 <sup>-39</sup> |
| UROD | MPC01279_1  | <i>Meloidogyne paranaensis</i>       | IV    | PP           | 2 x 10 <sup>-23</sup> |
| CPOX | ACC18701_1  | <i>Ancylostoma caninum</i>           | V     | AP           | 9 x 10 <sup>-21</sup> |
| FECH | SRC06613_1  | <i>Strongyloides ratti</i>           | IV    | AP           | 7 x 10 <sup>-17</sup> |

Human sequences of heme biosynthetic genes used as queries are as follows: ALAD (aminolevulinic acid dehydratase, AY319481.1) PBGD (porphobilinogen deaminase, NM\_000190.3), UROS (uroporphyrinogen III synthase, BC002573.2), UROD (uroporphyrinogen decarboxylase, CR456976.1), CPOX (coproporphyrinogen oxidase, NM\_000097.5), PPOX (protoporphyrinogen oxidase, NM\_000309.3), FECH (ferrochelatase, BC039841.1). A cut-off E-value of  $1 \times 10^{-4}$  was used in this tBLASTx analysis. Minus mark indicates no hits were found. In case hits were found, E-values for respective hits are shown. PP: plant-parasitic, AP: animal-parasitic, EP: entomopathogenic.
