# Supplementary material for: Identification of a Bacteria-Like Ferrochelatase in Strongyloides venezuelensis, an Animal Parasitic Nematode
Source: PubMed Central journal article supplement (PMC3596385; doi:10.1371/journal.pone.0058458), 2013-03-13
Supplement: pone.0058458.s005.pdf [file pone.0058458.s005.pdf]

**Table S5** BLAST homology search against nematode EST database (NEMBASE4) using *Strongyloides venezuelensis* ferrochelatase sequence as a query

| NEMBASE4 ID | species                         | clade | mode of life | E-value              |
|-------------|---------------------------------|-------|--------------|----------------------|
| SRC06613_1  | <i>Strongyloides ratti</i>      | IV    | AP           | $1 \times 10^{-177}$ |
| LSC01092_1  | <i>Litomosoides sigmodontis</i> | III   | AP           | $1 \times 10^{-47}$  |
| OVC00158_1  | <i>Onchocerca volvulus</i>      | III   | AP           | $1 \times 10^{-10}$  |

*S. venezuelensis* ferrochelatase protein sequence was used as a query against NEMBASE4 using tBLASTn algorithm (E-value cut-off,  $1 \times 10^{-4}$ ). AP: animal parasitic.
