# Supplementary material for: Identification of a Bacteria-Like Ferrochelatase in Strongyloides venezuelensis, an Animal Parasitic Nematode
Source: PubMed Central journal article supplement (PMC3596385; doi:10.1371/journal.pone.0058458), 2013-03-13
Supplement: pone.0058458.s006.pdf [file pone.0058458.s006.pdf]

**Table S6 Sequence similarities of FeCH proteins assessed by BLAST program**

|                             | Homo sapiens | Drosophila melanogaster | Saccharomyces cerevisiae | Strongyloides venezuelensis | Brugia malayi 1 | Brugia malayi 2 | Acanthocheilonema viteae | Dirofilaria immitis | Onchocerca volvulus | Escherichia coli | Bacillus subtilis |
|-----------------------------|--------------|-------------------------|--------------------------|-----------------------------|-----------------|-----------------|--------------------------|---------------------|---------------------|------------------|-------------------|
| Homo sapiens                | 885 (100)    |                         |                          |                             |                 |                 |                          |                     |                     |                  |                   |
| Drosophila melanogaster     | 431(55.7)    | 808 (100)               |                          |                             |                 |                 |                          |                     |                     |                  |                   |
| Saccharomyces cerevisiae    | 364 (51.3)   | 296 (42.5)              | 821 (100)                |                             |                 |                 |                          |                     |                     |                  |                   |
| Strongyloides venezuelensis | 107 (25.8)   | 67.8 (24.1)             | 84 (24.0)                | 758 (100)                   |                 |                 |                          |                     |                     |                  |                   |
| Brugia malayi 1             | 103 (27.2)   | 102 (25.3)              | 84 (24.0)                | 292 (45.0)                  | 755 (100)       |                 |                          |                     |                     |                  |                   |
| Brugia malayi 2             | 106 (27.5)   | 102 (24.9)              | 84 (24.0)                | 291 (45.0)                  | 749 (98.9)      | 756 (100)       |                          |                     |                     |                  |                   |
| Acanthocheilonema viteae    | 92 (25.4)    | 93 (24.0)               | 74 (23.0)                | 296 (45.6)                  | 615 (80.3)      | 619 (80.8)      | 764 (100)                |                     |                     |                  |                   |
| Dirofilaria immitis         | 100 (27.0)   | 102 (25.2)              | 84 (24.1)                | 312 (46.7)                  | 626 (81.0)      | 627 (81.0)      | 619 (79.5)               | 789 (100)           |                     |                  |                   |
| Onchocerca volvulus         | 98 (26.8)    | 95 (24.6)               | 83 (23.8)                | 305 (46.5)                  | 606 (79.0)      | 607 (79.0)      | 608 (81.1)               | 662 (86.3)          | 743 (100)           |                  |                   |
| Escherichia coli            | 105 (27.0)   | 101 (25.9)              | 96 (27.2)                | 202 (33.6)                  | 221 (36.8)      | 221 (36.8)      | 212 (34.9)               | 214 (35.5)          | 216 (35.5)          | 662 (100)        |                   |
| Bacillus subtilis           | 127 (28.5)   | 129 (27.6)              | 99 (25.1)                | 42 (23.4)                   | 59 (21.1)       | 57 (20.8)       | 64 (22.2)                | 64 (22.0)           | 64 (23.0)           | 77 (26.4)        | 640 (100)         |

BLAST scores and percent identity values (in brackets) were obtained by BLASTP program using the following FeCH protein sequences:

*Homo sapiens* (CAB65962), *Drosophila melanogaster* (AAC26225), *Saccharomyces cerevisiae* (EDV10759), *Strongyloides venezuelensis* (BAM62638.1, this study), *Brugia malayi* 1 (ADI33748), *Brugia malayi* 2 (ADI33749), *Acanthocheilonema viteae* (ADI33750), *Dirofilaria immitis* (ADI33752), *Onchocerca volvulus* (ADI33751), *Escherichia coli* (AP\_001124), and *Bacillus subtilis* (NP\_388894).
